# Supplementary material for: Primary Dysmenorrhea in Relation to Oxidative Stress and Antioxidant Status: A Systematic Review of Case-Control Studies
Source: PubMed Central journal article supplement (PMC7602455; doi:10.3390/antiox9100994), 2020-10-15
Supplement: antioxidants-09-00994-s001.pdf [file antioxidants-09-00994-s001.pdf]

## SUPPLEMENTARY MATERIAL

### **Primary dysmenorrhea in relation to oxidative stress and antioxidant status: a systematic review of case-control studies**

Maria Karolina Szmidt\*, Dominika Granda, Ewa Sicinska, Joanna Kaluza

**\*Corresponding author:** Maria Karolina Szmidt, Institute of Human Nutrition Sciences, Warsaw University of Life Sciences – SGGW, 159C Nowoursynowska Str., 02-776 Warsaw, Poland, E-mail: maria\_szmidt@sggw.edu.pl, Tel: +48 22 59 37 119

#### **Affiliations:**

Institute of Human Nutrition Sciences, Warsaw University of Life Sciences–SGGW, 02-776 Warsaw, Poland

**Table S1.** Search term strategy

| <b>Search number</b> | <b>Search term</b>                                                                                                                                                                                                                                                                                                                                                                                                                                                                                                                                                                               | <b>Pubmed – number of results</b> | <b>Scopus – number of results</b> |
|----------------------|--------------------------------------------------------------------------------------------------------------------------------------------------------------------------------------------------------------------------------------------------------------------------------------------------------------------------------------------------------------------------------------------------------------------------------------------------------------------------------------------------------------------------------------------------------------------------------------------------|-----------------------------------|-----------------------------------|
| #1                   | dysmenorrhea OR primary dysmenorrhea                                                                                                                                                                                                                                                                                                                                                                                                                                                                                                                                                             | 6,926                             | 12,608                            |
| #2                   | ((((((((((((((((((((inflammation) OR (dna damage)) OR (oxidative stress)) OR (antioxidant capacity)) OR (lipid peroxidation)) OR (catalase)) OR (glutathione peroxidase)) OR (glutathione reductase)) OR (isoprostane)) OR (nitric oxide)) OR (8-hydroxyguanosine)) OR (superoxide dismutase)) OR (malondialdehyde)) OR (hs-crp)) OR (nitrotyrosine)) OR (deoxyguanosine)) OR (interleukin-6)) OR (4-hydroxynonenal)) OR (protein carbonyl content)) OR (advanced glycation end products)) OR (advanced oxidation protein products)) OR (TNF-alpha)) OR (antioxidants)) OR (antioxidant status)) | 1,704,802                         | 1,739,506                         |
| #3                   | #1 AND #2                                                                                                                                                                                                                                                                                                                                                                                                                                                                                                                                                                                        | 317                               | 618                               |

**Table S2.** Details of quality assessment of case-control studies according to The Newcastle-Ottawa Scale (NOS)[32]

| <b>Authors</b>                | <b>Is the case definition adequate?</b> | <b>Representativeness of the cases</b> | <b>Selection of Controls</b> | <b>Definition of Controls</b> | <b>SELECTION (max. 4 points)</b> | <b>Comparability for the most important factor - age</b> | <b>Comparability for any additional factor</b> | <b>COMPARABILITY (max. 2 points)</b> | <b>Ascertainment of exposure</b> | <b>Same method of ascertainment for cases and controls</b> | <b>Non-response rate</b> | <b>EXPOSURE (max. 3 points)</b> | <b>TOTAL POINTS (max. 9 points)</b> |
|-------------------------------|-----------------------------------------|----------------------------------------|------------------------------|-------------------------------|----------------------------------|----------------------------------------------------------|------------------------------------------------|--------------------------------------|----------------------------------|------------------------------------------------------------|--------------------------|---------------------------------|-------------------------------------|
| <b>Akdemir et al.*[34]</b>    | 0                                       | 0                                      | 0                            | 1                             | <b>1</b>                         | 1                                                        | 1                                              | <b>2</b>                             | 0                                | 1                                                          | 0                        | <b>1</b>                        | <b>4</b>                            |
| <b>Aksoy et al. [35]</b>      | 1                                       | 1                                      | 0                            | 1                             | <b>3</b>                         | 1                                                        | 1                                              | <b>2</b>                             | 0                                | 1                                                          | 1                        | <b>2</b>                        | <b>7</b>                            |
| <b>Dikensoy et al. [36]</b>   | 1                                       | 0                                      | 0                            | 1                             | <b>2</b>                         | 1                                                        | 1                                              | <b>2</b>                             | 1                                | 1                                                          | 0                        | <b>2</b>                        | <b>6</b>                            |
| <b>Kaplan et al. [37]</b>     | 1                                       | 0                                      | 0                            | 1                             | <b>2</b>                         | 1                                                        | 0                                              | <b>1</b>                             | 0                                | 1                                                          | 0                        | <b>1</b>                        | <b>4</b>                            |
| <b>Orimadegun et al. [38]</b> | 1                                       | 1                                      | 1                            | 1                             | <b>4</b>                         | 1                                                        | 0                                              | <b>1</b>                             | 1                                | 1                                                          | 0                        | <b>2</b>                        | <b>7</b>                            |
| <b>Turhan et al. [30]</b>     | 1                                       | 0                                      | 0                            | 1                             | <b>2</b>                         | 1                                                        | 1                                              | <b>2</b>                             | 1                                | 1                                                          | 0                        | <b>2</b>                        | <b>6</b>                            |

\*Quality assessment was done based on published version of article. The information about case definition was later obtained via mail directly from authors.
